# Supplementary material for: Rapidly increasing macroalgal cover not related to herbivorous fishes on Mesoamerican reefs
Source: PubMed Central journal article supplement (PMC4893329; doi:10.7717/peerj.2084), 2016-05-31

**Legend**

HRI Sites  $\geq 8$  years history

- ★ Algae Increasing + Fish Increasing
- ★ Algae Increasing + Fish Decreasing
- ★ Algae Decreasing + Fish Increasing
- ★ Algae Decreasing + Fish Decreasing

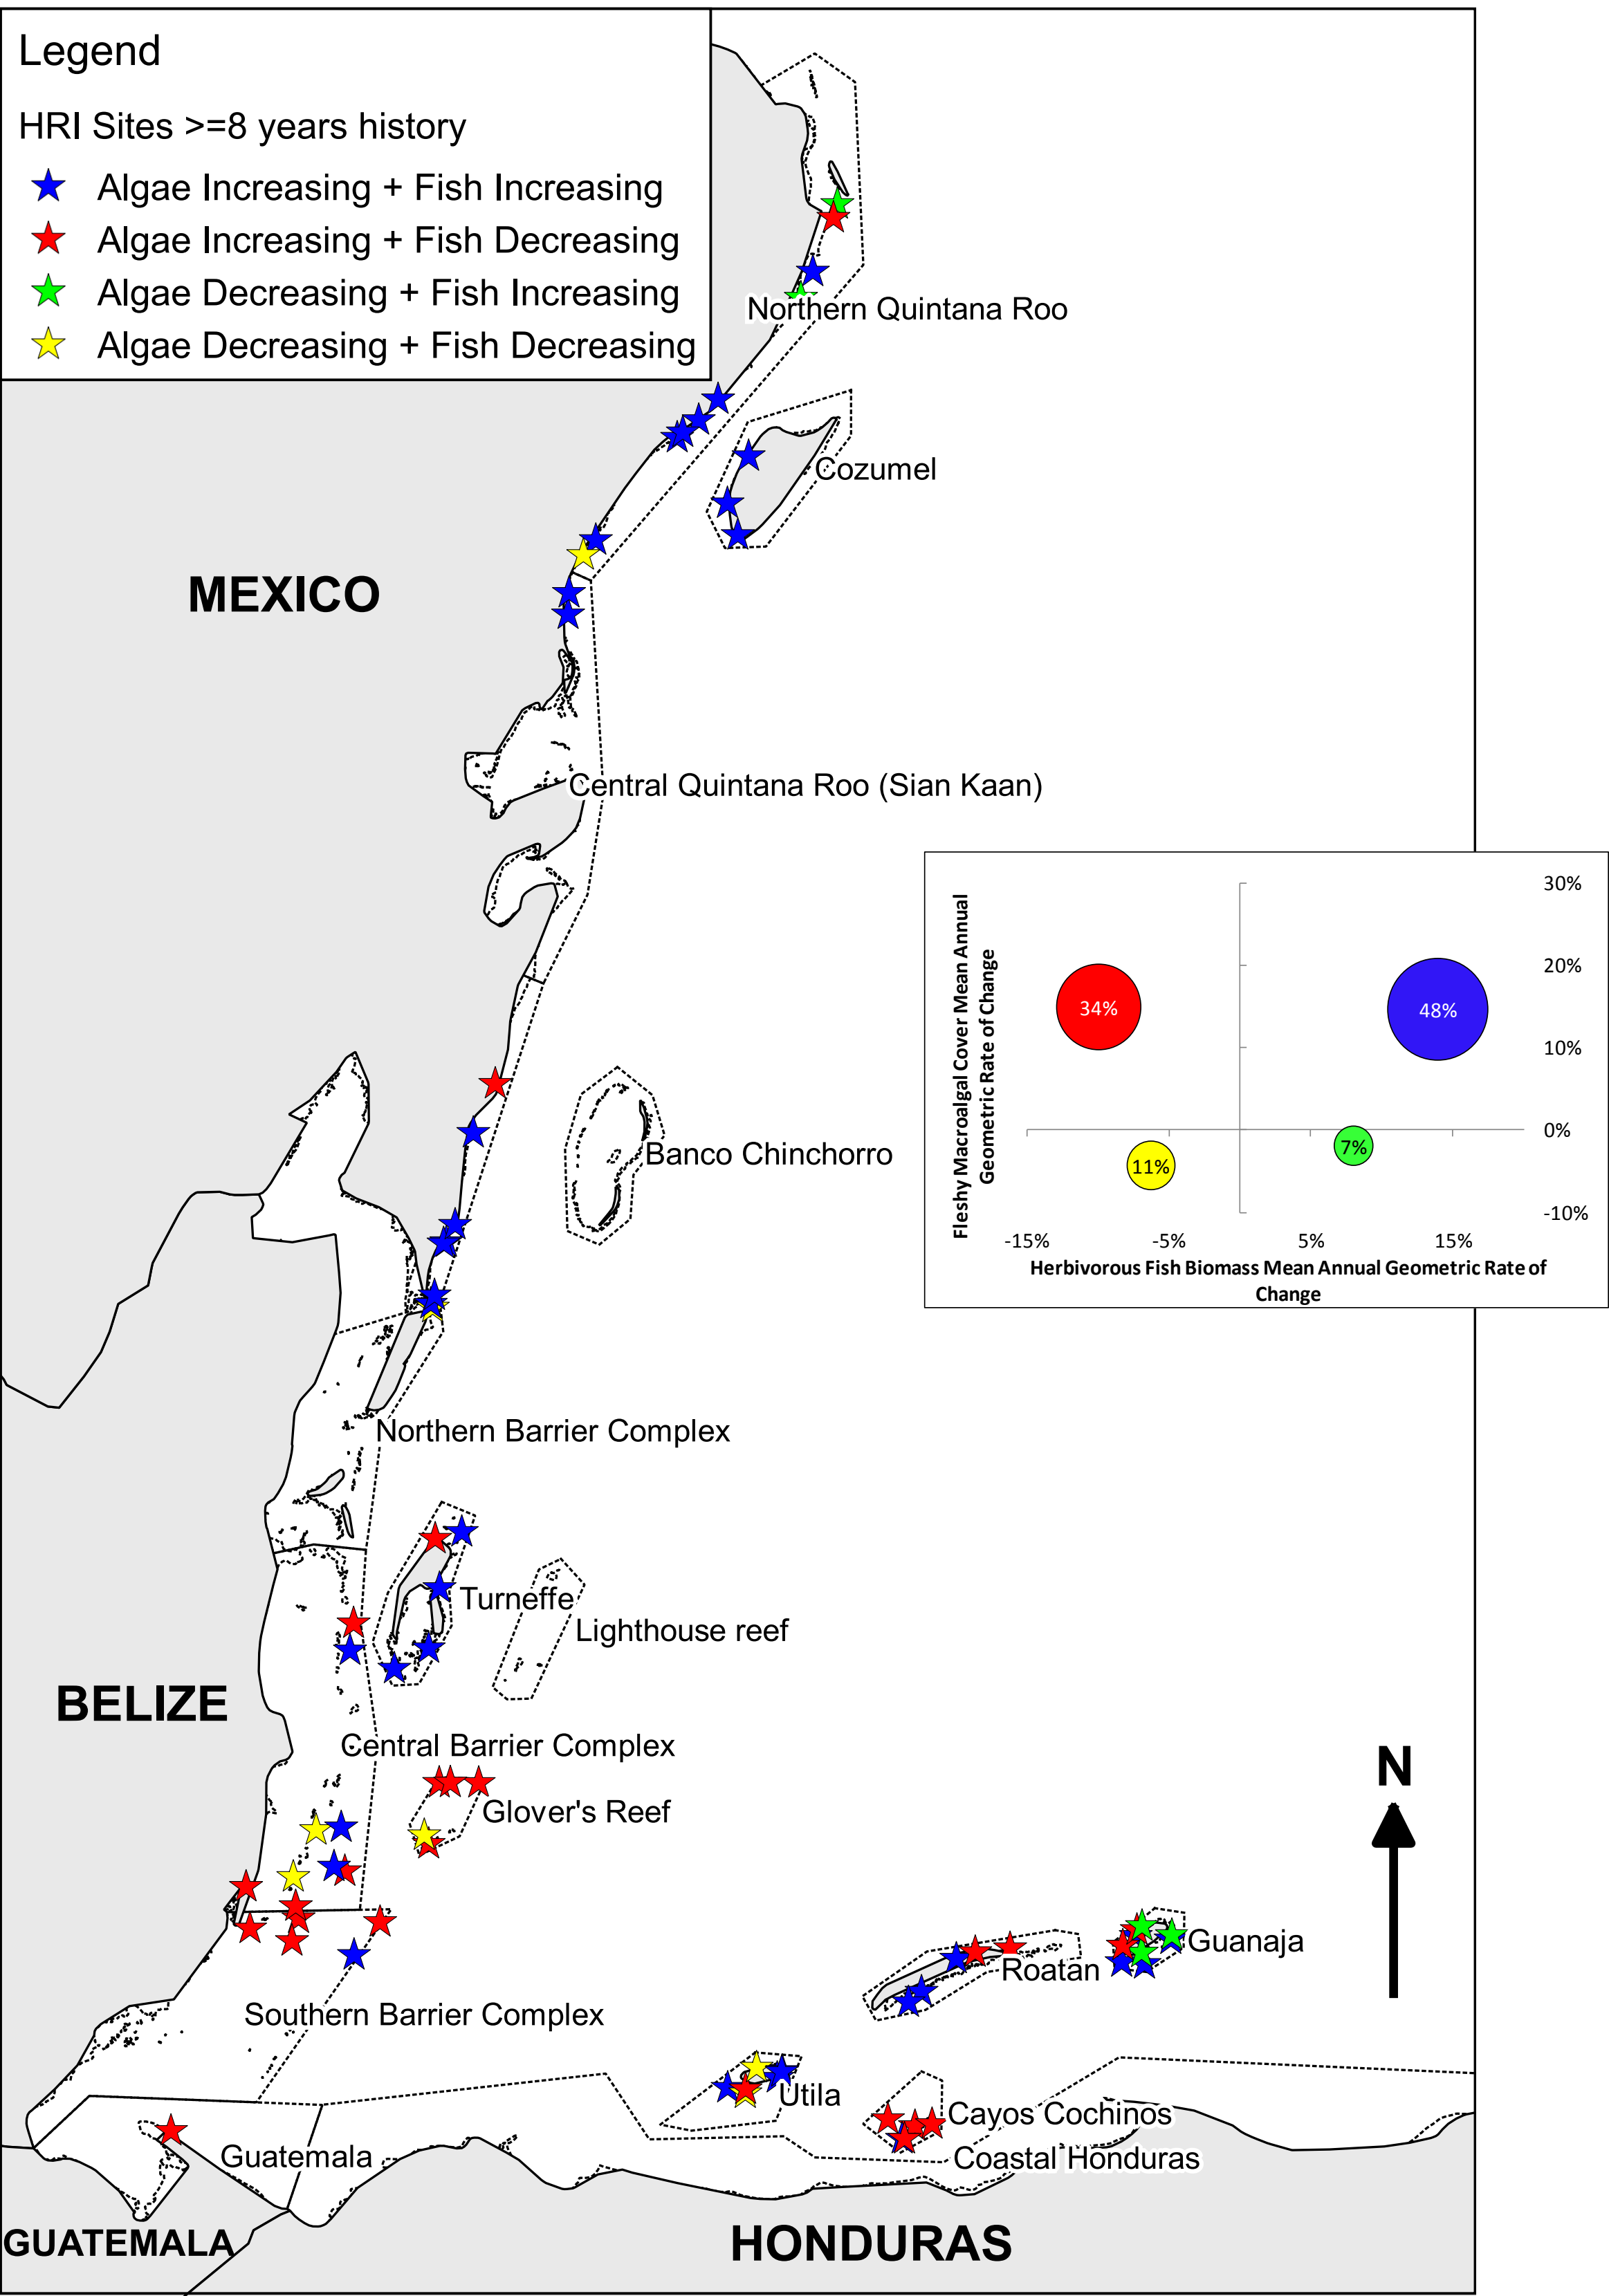

Supplement: peerj-04-2084-s003.pdf [file peerj-04-2084-s003.pdf]
