# Supplementary material for: Rapidly increasing macroalgal cover not related to herbivorous fishes on Mesoamerican reefs
Source: PubMed Central journal article supplement (PMC4893329; doi:10.7717/peerj.2084), 2016-05-31

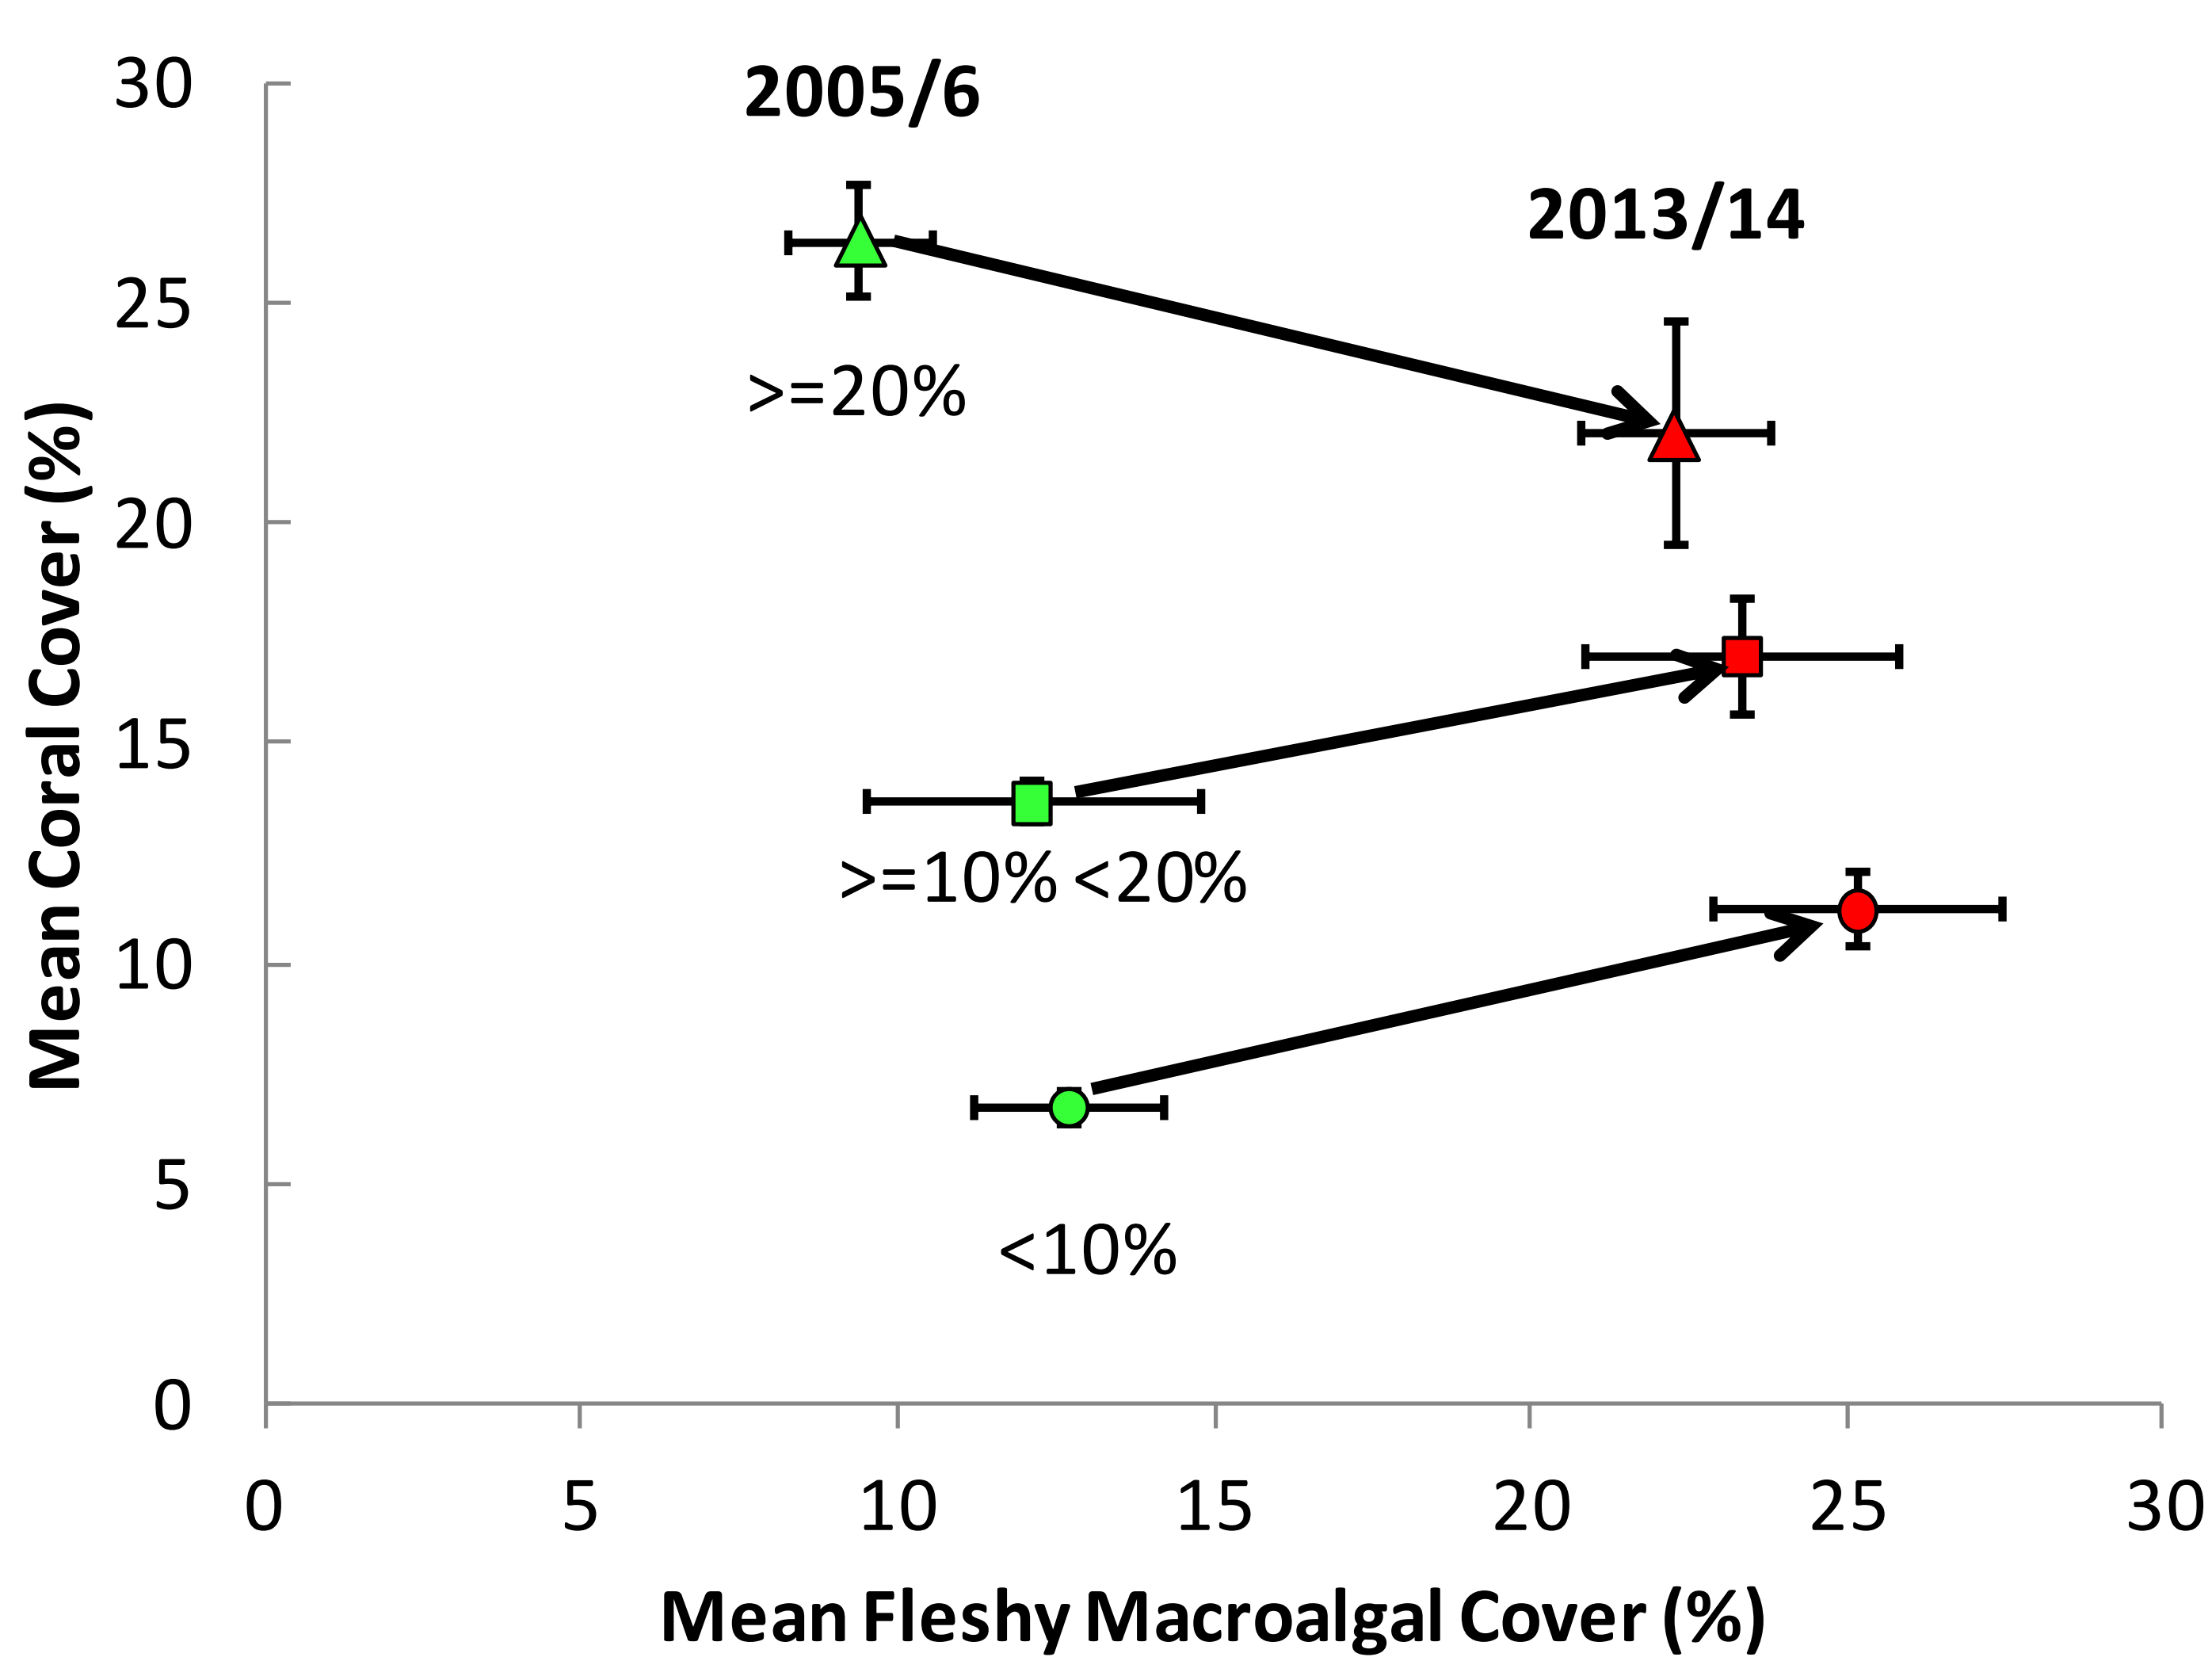

Supplement: peerj-04-2084-s004.pdf [file peerj-04-2084-s004.pdf]
