# Supplementary material for: Rapidly increasing macroalgal cover not related to herbivorous fishes on Mesoamerican reefs
Source: PubMed Central journal article supplement (PMC4893329; doi:10.7717/peerj.2084), 2016-05-31

**High**

**Mid**

**Low**

-60%      -40%      -20%      0%      20%      40%      60%

**Mean Annual Geometric Rate of Change**

**Herbivorous Fish 2005-2009    Macroalgal Cover 2009-2014**

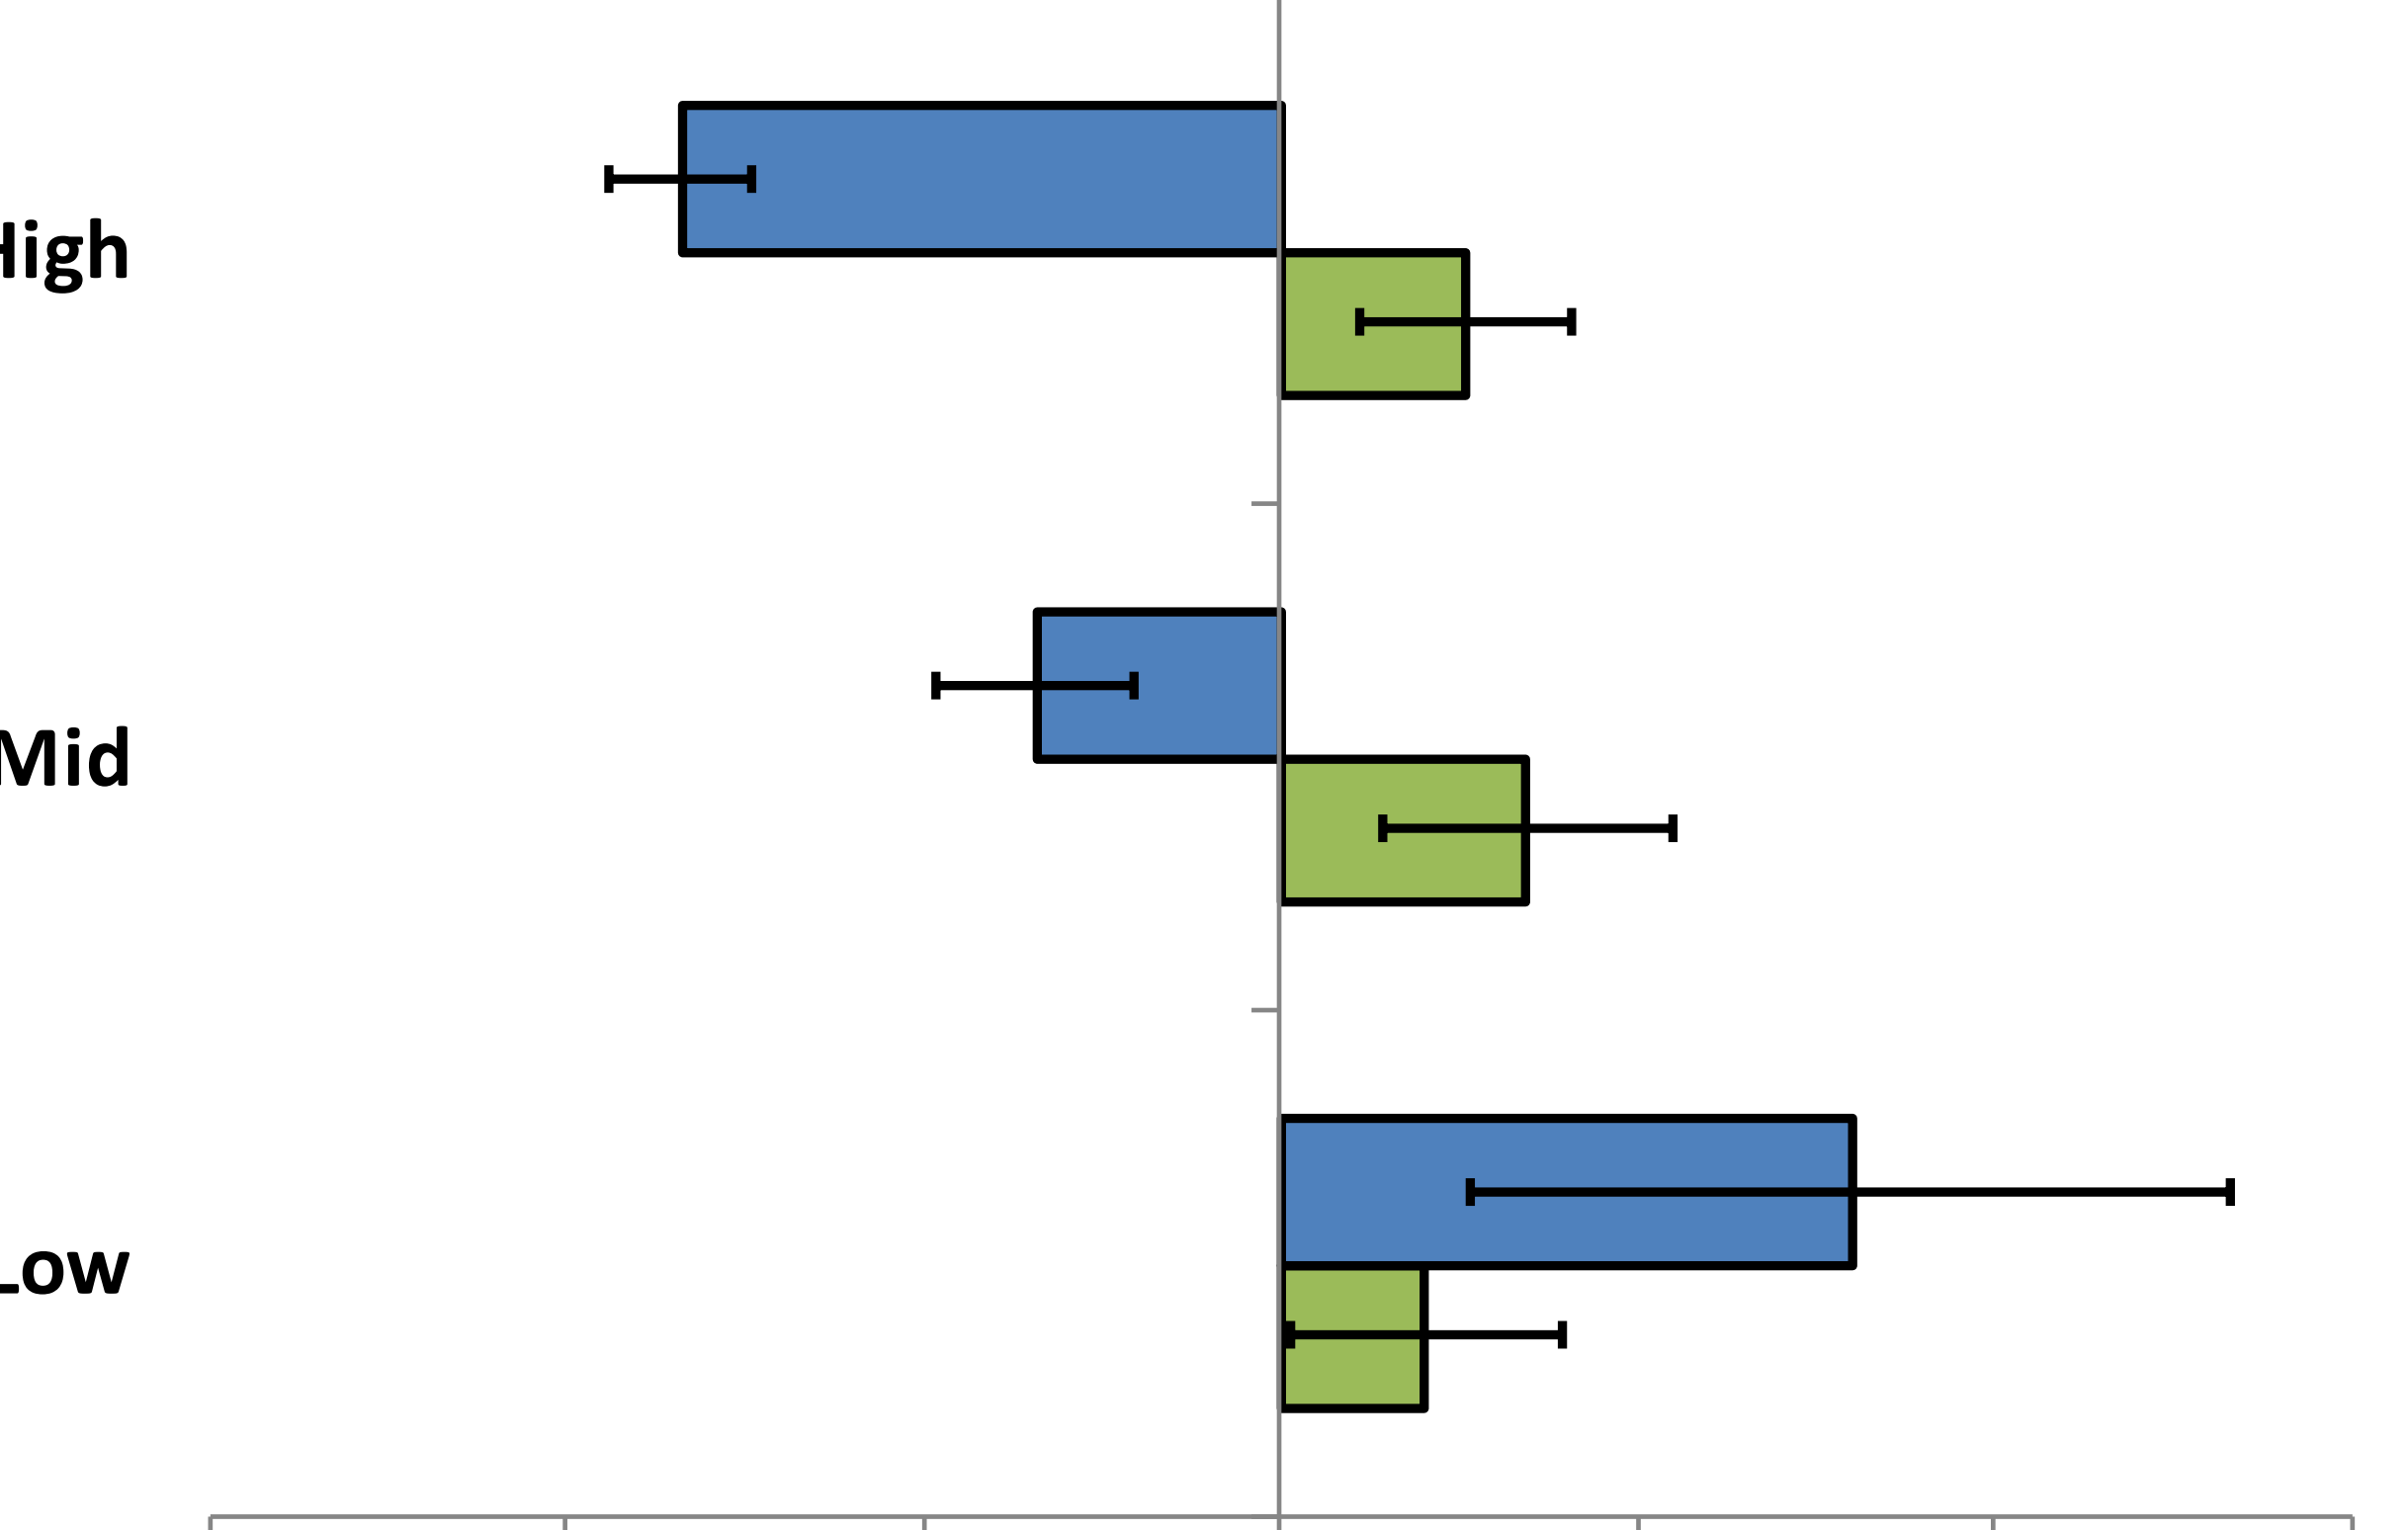

Supplement: peerj-04-2084-s006.pdf [file peerj-04-2084-s006.pdf]
